# 1 Shotgun Metagenomic Analysis Reveals New Insights on Bacterial 2 Community Profiles in Tempeh

3 Adi Yulandi<sup>1,2</sup>, Diana Elizabeth Waturangi<sup>2</sup>, Aris Tri Wahyudi<sup>1</sup>, Antonius Suwanto<sup>1\*</sup>

4 <sup>1</sup>Department of Biology, Faculty of Mathematics and Natural Science, IPB University (Bogor  
5 Agricultural University), Gedung Biologi. Jalan Agatis Kampus IPB Dramaga, 16680 Bogor,  
6 Indonesia.

7 <sup>2</sup>Faculty of Biotechnology, Atma Jaya Catholic University of Indonesia, Jalan Jenderal Sudirman 51,  
8 12930 Jakarta, Indonesia.

9 \*Corresponding Author: [anton.suwanto@atmajaya.ac.id](mailto:anton.suwanto@atmajaya.ac.id)

10

## 11 Abstract

12 **Objective:** Amplicon sequencing targeted 16S ribosomal RNA (rRNA) has been widely used for the  
13 analysis profile of the microbial community from fermented food samples. Previous results of 16S  
14 rRNA analysis metagenome showed that *Firmicutes* was the dominant *phylum* in tempeh. However,  
15 polymerase chain reaction (PCR) steps on amplicon sequencing analysis and intragenomic  
16 heterogeneity within 16S rRNA are believed to contribute to bias in the estimation of microbial  
17 community composition. An alternative approach known as shotgun metagenomic might be able to  
18 avoid this limitation. In this study, we employed total metagenomic DNA fragments sequenced  
19 directly for taxonomic dan functional profiling analysis.

20 **Result:** Taxonomic profiling showed that *Proteobacteria*, *Firmicutes*, and *Bacteroidetes* were the  
21 dominant *phyla* from direct shotgun metagenomic analysis in all tempeh samples. In terms of  
22 composition, the shotgun metagenomic study revealed that *Proteobacteria* was the most relatively  
23 abundant phylum. Functional profiling showed that iron complex outer-membrane receptor protein  
24 (KEGG ID: K02014) was the most transcribed genes based on metagenome from tempeh samples.

25 Keywords: Tempeh, Shotgun metagenomics, Proteobacteria, Firmicutes

26

## 27 **Introduction**

28 Tempeh is a fermented food that originated in Indonesia. The biochemical changes of soybean  
29 during microbial fermentation increased not only nutritional values but also health-promoting  
30 bioactive compounds in the tempeh. Compared to other indigenous soybean-based fermented food  
31 such as *nato*, *miso* (Japan), *kinema* (Nepal), and *douchi* (China), which used *Bacillus* spp. as  
32 inoculum, tempeh used *Rhizopus* spp. in the production \cite{Astuti\_2000}. The nature of tempeh  
33 production processes creates consortia of microorganisms not only from tempeh inoculum but also  
34 from production materials and environment. \cite{Tamang\_2016}. Over the past decade, useful tools  
35 of next-generation sequencing (NGS) such as metagenomics has been applied to study microbial  
36 consortia from fermented food microbial ecology. These culture-independent techniques have two  
37 different approaches to study the taxonomic composition of the microbial community and their  
38 relative abundances. The marker-genes are amplified from total microbial genomic DNA through  
39 PCR, followed by DNA sequencing is the commonly applied option for study fermented food  
40 microbial ecology \cite{Defilippis\_2017}. Other approaches called shotgun metagenomics. The total  
41 microbial genomic DNA presents in a sample will be untargeted sequencing in this approach.  
42 Besides for profile taxonomic composition study, shotgun metagenomics could be used for  
43 functional study of microbial communities based on more objective analysis through direct whole-  
44 genome sequencing \cite{Sharpton\_2014, Quince\_2017}. The microbial ecology study employing  
45 shotgun metagenomic analysis on samples could enhance our knowledge on both taxonomic and  
46 functional profiling of fermented food microbial community. Previous metagenomic studies  
47 microbial community during tempeh production were conducted employing amplicon sequencing  
48 targeted region V4 16S rRNA gene \cite{Radita\_2017, Radita\_2018, Pangastuti\_2019}. These

49 studies focused on the dynamic taxonomic profile of the microbial community from tempeh  
50 metagenome samples and indicated that Firmicutes was the predominant phylum. To enhance our  
51 knowledge on the taxonomic and functional profile of the microbial community in tempeh  
52 production, we conducted this study based on the shotgun metagenomic analysis.

## 53 **Material and Methods**

### 54 **Samples**

55 Fresh tempeh samples were collected from two local traditional producers in Bogor designated as  
56 EMP and WJB. The samples have been used as a source for microbial community analysis on  
57 tempeh for many years \cite{Radita\_2018}. The EMP and WJB producer was representative for the  
58 different method in soybean boiling on tempeh production. The EMP is employing a one-time  
59 boiling while The WJB two-time.

### 60 **Total DNA Extraction**

61 The extraction process was adapted from the previous study \cite{Seumahu\_2012}. One hundred-  
62 gram of tempeh sample was homogenized in 300 mL of phosphate buffer saline (PBS) using the  
63 blender for 30 seconds. The homogenate was centrifuged at 1.000 x g for 10 minutes. Supernatants  
64 were collected and centrifuged at 10.000 x g for 3 minutes. The pellets were subjected to total  
65 microbial DNA extraction employing ZymoBIOMICS DNA/RNA Mini Kit (Zymo Research,  
66 California, USA) protocols.

67

### 68 **Metagenome Sequencing**

69 The whole metagenome library preparation and sequencing process were using services from  
70 NovogeneAIT Genomics Singapore Pte Ltd. The whole microbial DNA was sheared to produce  
71 library fragments by restriction enzyme with a minimum of one  $\mu\text{g}$  of DNA as input. Precisely

72 quantifying microbial DNA was used Qubit 2.0 (Thermo Fischer Scientific, United States). The  
73 purity and degradation assessment for microbial DNA was employing NanoDrop (Thermo Fischer  
74 Scientific, United States) and gel electrophoresis. The pair-end sequencing library was prepared  
75 using the TruSeq DNA PCR-Free Prep Kit (Illumina, United States). The prepared library was  
76 sequenced on the NovaSeq 6000 platform ( 2 x 150 bp chemistry) (Illumina, United States).

#### 77 **Shotgun Metagenomic Sequence Data Analysis.**

78 The sequenced reads (raw reads) were filtered from reads; containing adapters, reads containing N (  
79 the base cannot be determined) > 10% and reads containing low quality (Qscore<= 5) base which is  
80 over 50% of the total base using NovogeneAIT Genomics Singapore Pte Ltd pipeline to produce  
81 high-quality paired-end reads (clean reads). The removal of *Rhizopus* spp reads contamination from  
82 the clean reads were employed Read QC module from MetaWrap pipeline \cite{Uritskiy\_2018}  
83 using *Rhizopus microsporus* var. *microsporus* str. ATCC 52814 (GCA\_002083745.1) whole-genome  
84 sequence as a reference. The SqueezeMeta pipelines \cite{Tamames\_2019} were employed for  
85 assembly, taxonomic, functional and bin analysis. The pipelines used co-assembly mode option  
86 where reads from all samples are pooled before the assembly using Megahit \cite{Li\_2015} step  
87 performed. The SqueezeMeta binning pipeline includes DAS Tool \cite{Sieber\_2018} to merge  
88 multiple binning results from Maxbin \cite{Wu\_2014} and Metabat2 \cite{Kang\_2019} in just set.  
89 CheckM \cite{Parks\_2015} software was used to estimate the goodness of the bins in the pipeline.

90

91

92

93

94

## 95 **Results**

### 96 **Metagenome Sequencing and Assembly Statistic**

97 The total microbial DNA extracted from tempeh samples collected from two different tempeh  
98 producers in Bogor, Indonesia, was subjected to Illumina whole metagenome sequencing pipelines.

99 The average effective rate of clean reads from two raw reads metagenomic data after the quality  
100 trimming was 99.93%. Total 9,699,953 (12.28 %) reads from 78,942,348 EMP clean reads and  
101 5,428,509 (5.02%) from 107,981,246 WJB clean reads metagenomic were mapped to the *Rhizopus*  
102 genome reference. The number of contigs results from the co-assembly step data were 316,661.

103 The longest contigs were 485167 bp and N50 value 1924.

### 104 **Taxonomic and Functional Profiling**

105 The average reads it mapped with reference database using the Diamond \cite{Buchfink\_2015}  
106 search on SqueezeMeta pipelines was 92.15 %. Individual gene annotation reads are used to produce  
107 a consensus for contigs. GeneBank nr was performed as a reference on taxonomic profiling. Contigs  
108 with phylum annotation were 271, 375 (85.7% from total contigs). Abundance estimation contig in  
109 each sample, the pipelines mapped clean reads onto the contigs resulting assembly step. Among  
110 bacteria, *Proteobacteria* was the abundant phylum (Figure 1). Functional profiling used the latest  
111 publicly version of KEGG database for KEGG ID annotation. Iron complex outer-membrane  
112 receptor protein (KEGG ID: K02014) was the most transcribed expression in the metagenome from  
113 tempeh samples (Figure 2).

### 114 **Binning and Bin Check**

115 The total number of bins obtained from co-assembly metagenome EMP and WJB samples result  
116 from DAS tool were 22. According to CheckM result, nine bins categorized as good-quality bins,

117 which completeness more than 75% with less than 10% contamination. Among good-quality bins,  
118 six categorized as high-quality bins, which completeness more than 90% (Table 1).

119

## 120 **Discussion**

121 Study of the microbial community of EMP and WJB tempeh samples using 16S rRNA metagenome  
122 sequencing analysis already conducted. Concordant with the result of shotgun metagenome  
123 sequencing analysis in this study, *Proteobacteria*, *Firmicutes*, and *Bacteroidetes* were the abundant  
124 phylum, although different in composition. *Firmicutes* relatively most abundant in amplicon  
125 sequencing study while in a shotgun metagenomics study was *Proteobacteria*. The data expand the  
126 understanding of bioprocess during soybean fermentation compare to previous microbial ecology  
127 study using amplicon sequencing \cite{Kumar\_2019, Sarkar\_2002}.

## 128 **Data Availability**

129 The tempeh metagenomic raw reads used for this study were deposit in publicly accessible NCBI's  
130 Sequence Read Archive (SRA) under the accession number: PRJNA605305.

131

## 132 **References**

- 133 1. Astuti, M., Meliala, A., Dalais, F.S., Wahlqvist, M.L.: Tempe, a nutritious and healthy food  
134 from indonesia. *Asia Paci\_c Journal of Clinical Nutrition* 9(4), 322{325 (2000).  
135 doi:10.1046/j.1440-6047.2000.00176.x
- 136 2. Tamang, J.P., Watanabe, K., Holzapfel, W.H.: Review: Diversity of Microorganisms in  
137 Global Fermented Foods and Beverages. *Frontiers in Microbiology* 7 (2016).  
138 doi:10.3389/fmicb.2016.00377. Accessed 2020-03 11

- 139 3. De Filippis, F., Parente, E., Ercolini, D.: Metagenomics insights into food fermentations.  
140 *Microbial Biotechnology* 10(1), 91{102 (2017). doi:10.1111/1751-7915.12421. Accessed  
141 2020-03-11
- 142 4. Sharpton, T.J.: An introduction to the analysis of shotgun metagenomic data. *Frontiers in*  
143 *Plant Science* 5 (2014). doi:10.3389/fpls.2014.00209. Accessed 2020-03-11
- 144 5. Quince, C., Walker, A.W., Simpson, J.T., Loman, N.J., Segata, N.: Shotgun metagenomics,  
145 from sampling to analysis. *Nature Biotechnology* 35(9), 833{844 (2017).  
146 doi:10.1038/nbt.3935. Accessed 2020-03-11
- 147 6. Kumar, J., Sharma, N., Kaushal, G., Samurailatpam, S., Sahoo, D., Rai, A.K., Singh, S.P.:  
148 Metagenomic insights into the taxonomic and functional features of kinema, a traditional  
149 fermented soybean product of sikkim himalaya. *Frontiers in Microbiology* 10 (2019).  
150 doi:10.3389/fmicb.2019.01744
- 151 7. Sarkar, P.K., Hasenack, B., Nout, M.J.R.: Diversity and functionality of *Bacillus* and related  
152 genera isolated from spontaneously fermented soybeans (Indian Kinema) and locust beans  
153 (African Soumbala). *International Journal of Food Microbiology* 77(3), 175{186 (2002).  
154 doi:10.1016/S0168-1605(02)00124-1. Accessed 2020-03-11
- 155 8. Radita, R., Suwanto, A., Kurosawa, N., Wahyudi, A.T., Rusmana, I.: Metagenome analysis  
156 of tempeh production: Where did the bacterial community in tempeh come from? *Technical*  
157 *Report 4* (2017)
- 158 9. Radita, R., Suwanto, A., Kurosawa, N., Wahyudi, Rusmana, I.: Firmicutes is the predominant  
159 bacteria in tempeh. *International Food Research Journal* 25(6), 2313{2320 (2018)
- 160 10. Pangastuti, A., Al\_sah, R.K., Istiana, N.I., Sari, S.L.A., Setyaningsih, R., Susilowati, A.,  
161 Purwoko, T.: Metagenomic analysis of microbial community in over-fermented tempeh.  
162 *Biodiversitas Journal of Biological Diversity* 20(4), 1106{1114 (2019).  
163 doi:10.13057/biodiv/d200423

- 164 11. Seumahu, C.A., Suwanto, A., Rusmana, I., Solihin, D.D.: Comparison of DNA extraction  
165 methods for microbial community analysis in Indonesian tempe employing amplified  
166 ribosomal intergenic spacer analysis. *HAYATI Journal of Biosciences* 19(2), 93-98 (2012).  
167 doi:10.4308/hjb.19.2.93
- 168 12. Uritskiy, G.V., DiRuggiero, J., Taylor, J.: MetaWRAP: a flexible pipeline for genome-resolved  
169 metagenomic data analysis. *Microbiome* 6(1), 158 (2018). doi:10.1186/s40168-018-0541-1.  
170 Accessed 2020-03-11
- 171 13. Tamames, J., Puente-Sánchez, F.: SqueezeMeta, A Highly Portable, Fully Automatic  
172 Metagenomic Analysis Pipeline. *Frontiers in Microbiology* 9 (2019).  
173 doi:10.3389/fmicb.2018.03349. Accessed 2020-03-11
- 174 14. Li, D., Liu, C.-M., Luo, R., Sadakane, K., Lam, T.-W.: MEGAHIT: an ultra-fast single-node  
175 solution for large and complex metagenomics assembly via succinct de Bruijn graph. *Bioinformatics*  
176 (Oxford, England) 31(10), 1674-1676 (2015). doi:10.1093/bioinformatics/btv033
- 177 15. Sieber, C.M.K., Probst, A.J., Sharrar, A., Thomas, B.C., Hess, M., Tringe, S.G., Banfield,  
178 J.F.: Recovery of genomes from metagenomes via a dereplication, aggregation and scoring  
179 strategy. *Nature Microbiology* 3(7), 836-843 (2018). doi:10.1038/s41564-018-0171-1. Accessed  
180 2020-03-11
- 181 16. Wu, Y.-W., Tang, Y.-H., Tringe, S.G., Simmons, B.A., Singer, S.W.: MaxBin: an automated  
182 binning method to recover individual genomes from metagenomes using an expectation-  
183 maximization algorithm. *Microbiome* 2(1), 26 (2014). doi:10.1186/2049-2618-2-26.  
184 Accessed 2020-03-11
- 185 17. Kang, D.D., Li, F., Kirton, E., Thomas, A., Egan, R., An, H., Wang, Z.: MetaBAT 2: an  
186 adaptive binning algorithm for robust and efficient genome reconstruction from metagenome  
187 assemblies. *PeerJ* 7 (2019). doi:10.7717/peerj.7359. Accessed 2020-03-11



- 188 18. Parks, D.H., Imelfort, M., Skennerton, C.T., Hugenholtz, P., Tyson, G.W.: CheckM:  
189 assessing the quality of microbial genomes recovered from isolates, single cells, and  
190 metagenomes. *Genome Research*, 186072{114 (2015). doi:10.1101/gr.186072.114. Accessed  
191 2020-03-11
- 192 19. Buch\_nk, B., Xie, C., Huson, D.H.: Fast and sensitive protein alignment using DIAMOND.  
193 *Nature Methods* 12(1), 59{60 (2015). doi:10.1038/nmeth.3176. Accessed 2020-03-1

194

195

196

197

198

199

200

201

202

203

204

205

206

207

208

209

210 Figure 1. The taxonomic abundance of the microbial community tempeh samples at the rank of

211 phylum

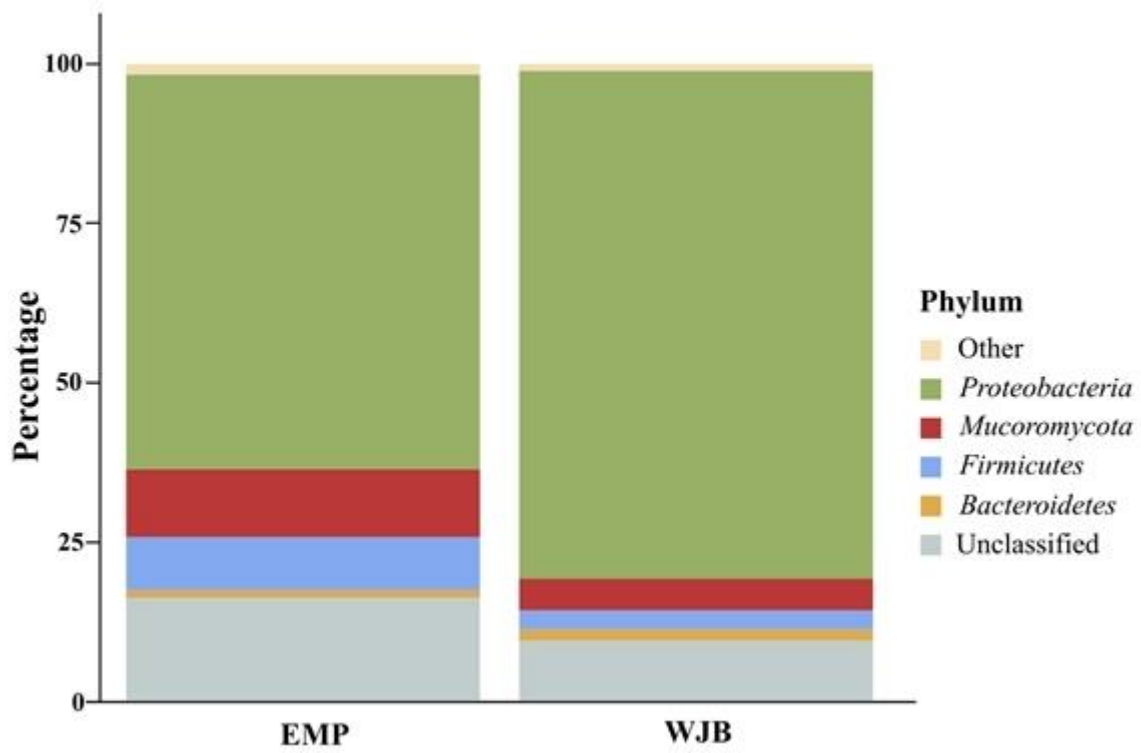

212

213

214

215

216

217

218

219

220

221

222 Figure 2. The functional profile of the metagenome tempeh samples using KEGG annotation in TPM

223 (transcripts per kilobase million)

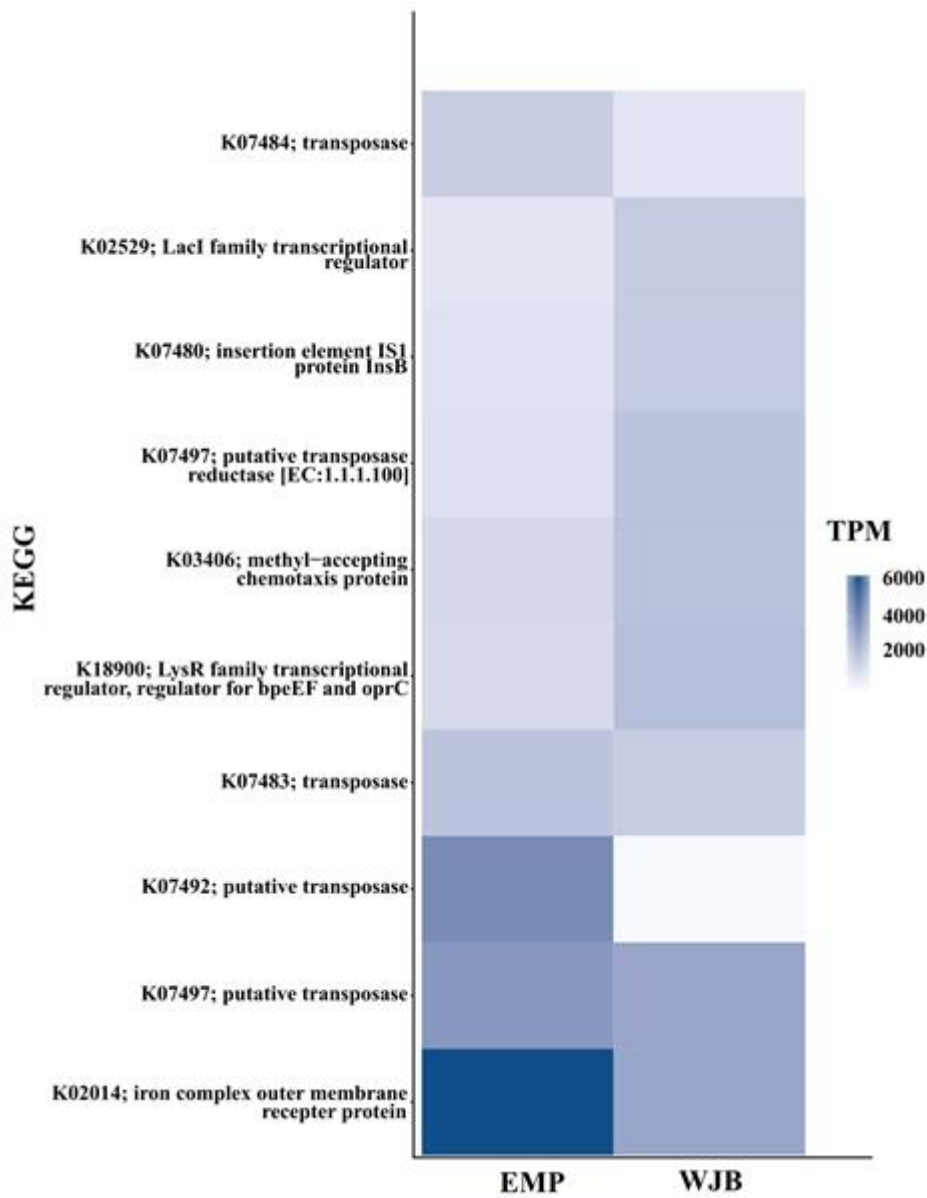

224

225

226

227

228

229

230 Tabel 1. High quality bins (>90% completion, <10% contamination) obtained by co-assembly mode  
231 of EMP and WJB.

| Taxa                             | Size (bp) | Completeness | Contami<br>nation | Taxonomic rank |
|----------------------------------|-----------|--------------|-------------------|----------------|
| <i>Bacteria</i>                  | 4,989,656 | 100%         | 0.16%             | <i>Kingdom</i> |
| <i>Lactobacillus delbrueckii</i> | 1,651,262 | 98.33%       | 0.16%             | <i>Species</i> |
| <i>Bacteria</i>                  | 1,657,902 | 96.55%       | 0.78%             | <i>Kingdom</i> |
| <i>Bacteria</i>                  | 2,925,287 | 95.69%       | 3.61%             | <i>Kingdom</i> |
| <i>Lactobacillus fermentum</i>   | 2,113,084 | 95.56%       | 2.26%             | <i>Species</i> |
| <i>Bacilli</i>                   | 4,300,435 | 93.32%       | 6.62%             | <i>Class</i>   |
| <i>Escherichia coli</i>          | 4,496,589 | 85.79%       | 4.3%              | <i>Species</i> |
| <i>Bacteria</i>                  | 6,993,346 | 85.61%       | 4.23%             | <i>Kingdom</i> |
| <i>Gammaproteobacteria</i>       | 3,538,428 | 81.82%       | 7.79%             | <i>Class</i>   |

232

233

234

235

236
